# Supplementary material for: Synthesis, characterization and oxygen atom transfer reactivity of a pair of Mo(iv)O- and Mo(vi)O2-enedithiolate complexes – a look at both ends of the catalytic transformation
Source: Royal Society of Chemistry journal article supplement (doi:10.1039/c7dt01470h), 2017-01-01
Supplement: c7dt01470h1.pdf [file c7dt01470h1.pdf]

## Supporting Information

---

### **Synthesis, characterization and oxygen atom transfer reactivity of a pair of Mo(IV)O- and Mo(VI)O<sub>2</sub>-enedithiolate complexes – a look at both ends of the catalytic transformation**

Ashta C. Ghosh,<sup>a</sup> Prinson P. Samuel,<sup>b</sup> Carola Schulzke<sup>c</sup>

<sup>a</sup>Institute of Condensed Matter and Nanosciences, Molecules, Solids and Reactivity (IMCN/MOST), Université catholique de Louvain, Place L. Pasteur 1, 1348 Louvain-la-Neuve, Belgium. E-mail: [ashtajuchem@gmail.com](mailto:ashtajuchem@gmail.com)

<sup>b</sup>Universität Göttingen, Institut für Anorganische Chemie, Tammannstr. 4, 37077 Göttingen, Germany.

<sup>c</sup>Institut für Biochemie, Ernst-Moritz-Arndt-Universität Greifswald, Felix-Hausdorff-Strasse 4, 17487 Greifswald, Germany. E-mail: [carola.schulzke@uni-greifswald.de](mailto:carola.schulzke@uni-greifswald.de)

---

**Table S1.** Crystal Data and Structure Refinement Parameters for **1**.

| parameters                                                                                               | (Bu <sub>4</sub> N) <sub>2</sub> [MoO(ntdt) <sub>2</sub> ] ( <b>1</b> ) |
|----------------------------------------------------------------------------------------------------------|-------------------------------------------------------------------------|
| formula                                                                                                  | C <sub>56</sub> H <sub>88</sub> MoN <sub>2</sub> OS <sub>4</sub>        |
| formula weight                                                                                           | 1029.46                                                                 |
| crystal system                                                                                           | Orthorhombic                                                            |
| space group                                                                                              | <i>P</i> 2 <sub>1</sub> 2 <sub>1</sub> 2 <sub>1</sub>                   |
| <i>Z</i>                                                                                                 | 4                                                                       |
| <i>a</i> , Å                                                                                             | 14.281(3)                                                               |
| <i>b</i> , Å                                                                                             | 14.491(3)                                                               |
| <i>c</i> , Å                                                                                             | 27.124(5)                                                               |
| $\alpha = \beta = \gamma$ , deg                                                                          | 90.00                                                                   |
| <i>V</i> , Å <sup>3</sup>                                                                                | 5613(2)                                                                 |
| <i>T</i> , K                                                                                             | 133(2)                                                                  |
| $\lambda(\text{Mo}_{k\alpha})$ , Å                                                                       | 0.71073                                                                 |
| $\mu$ , mm <sup>-1</sup>                                                                                 | 0.420                                                                   |
| <i>D</i> <sub>calcd.</sub> , g/cm <sup>3</sup>                                                           | 1.218                                                                   |
| <i>F</i> (000)                                                                                           | 2208                                                                    |
| reflections [ <i>I</i> > 2σ( <i>I</i> )]                                                                 | 9861                                                                    |
| unique reflections                                                                                       | 10862                                                                   |
| measured reflections                                                                                     | 49904                                                                   |
| <i>R</i> <sub>int</sub>                                                                                  | 0.0378                                                                  |
| GOF on <i>F</i> <sup>2</sup>                                                                             | 1.010                                                                   |
| <i>R</i> <sub>1</sub> <sup>[a]</sup> , <i>R</i> <sub>w</sub> <sup>[b]</sup> [ <i>I</i> > 2σ( <i>I</i> )] | 0.0305, 0.0690                                                          |
| <i>R</i> <sub>1</sub> , <i>R</i> <sub>w</sub> (all data)                                                 | 0.0362, 0.0706                                                          |
| $\Delta\rho$ max/min [e Å <sup>-3</sup> ]                                                                | 0.414, -0.277                                                           |

$$^{[a]}R_1 = \sum ||F_o| - |F_c|| / \sum |F_o|; ^{[b]}R_w = [\sum \{w(F_o^2 - F_c^2)^2\} / \sum \{w(F_o^2)^2\}]^{1/2}$$

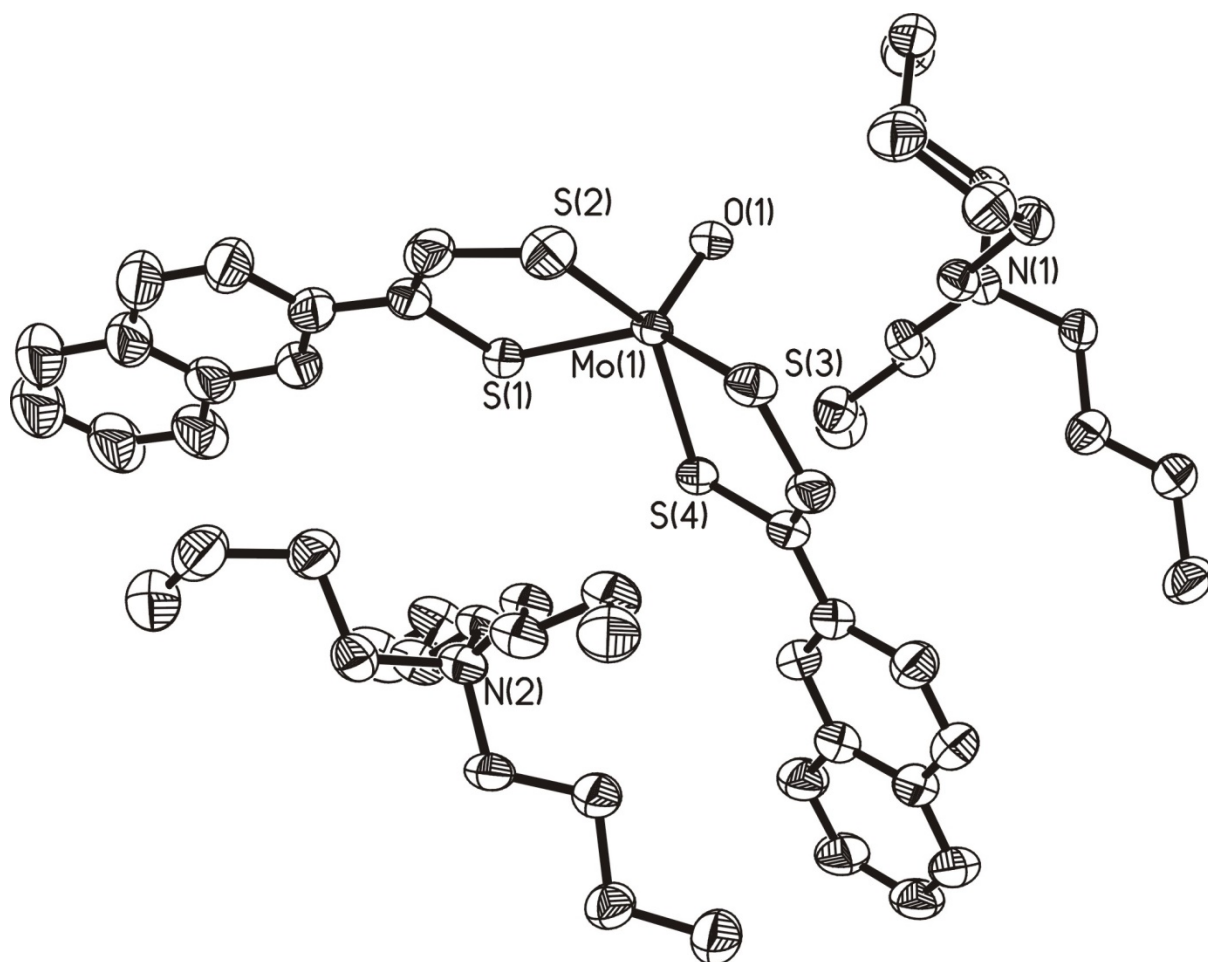

**Figure S1.** Molecular structure of  $[\text{Bu}_4\text{N}]_2[\text{MoO}(\text{ntdt})_2]$  (**1**) with 50% probability thermal ellipsoids.

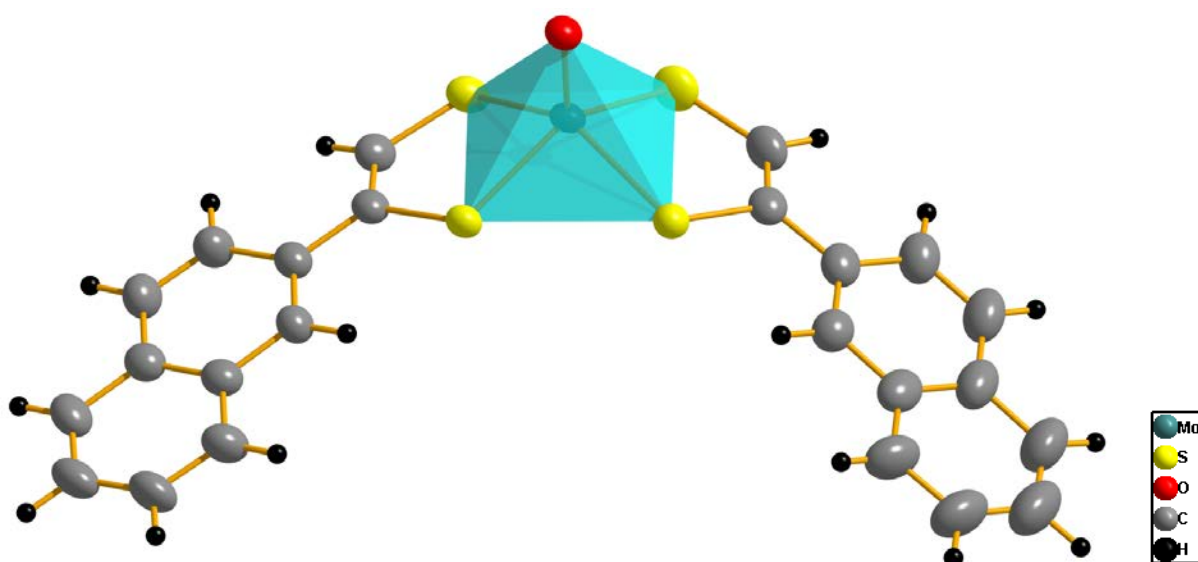

**Figure S2.** Molecular structure of the dianion of  $[\text{Bu}_4\text{N}]_2[\text{MoO}(\text{ntdt})_2]$  (**1**) showing the square-based pyramidal geometry of the  $\text{Mo}^{\text{IV}}\text{OS}_4$  unit.

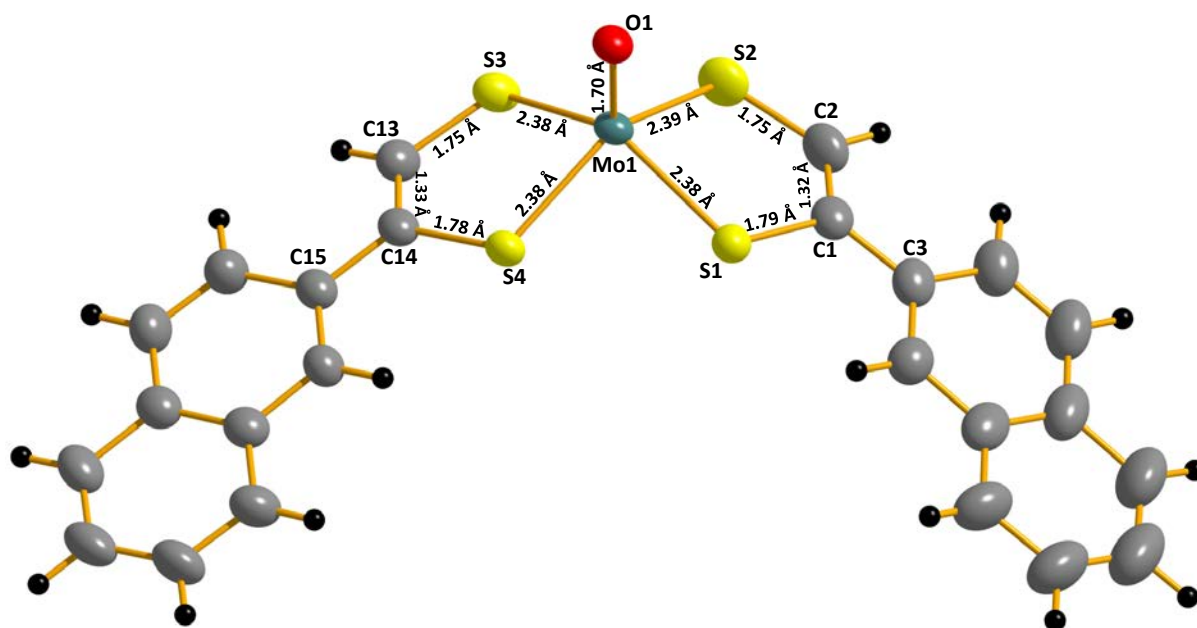

**Figure S3.** Molecular structure of the dianion of  $[\text{Bu}_4\text{N}]_2[\text{MoO}(\text{ntdt})_2]$  (**1**) showing the bond lengths in angstrom for the  $\text{MoOS}_4\text{C}_4$  structural motif.

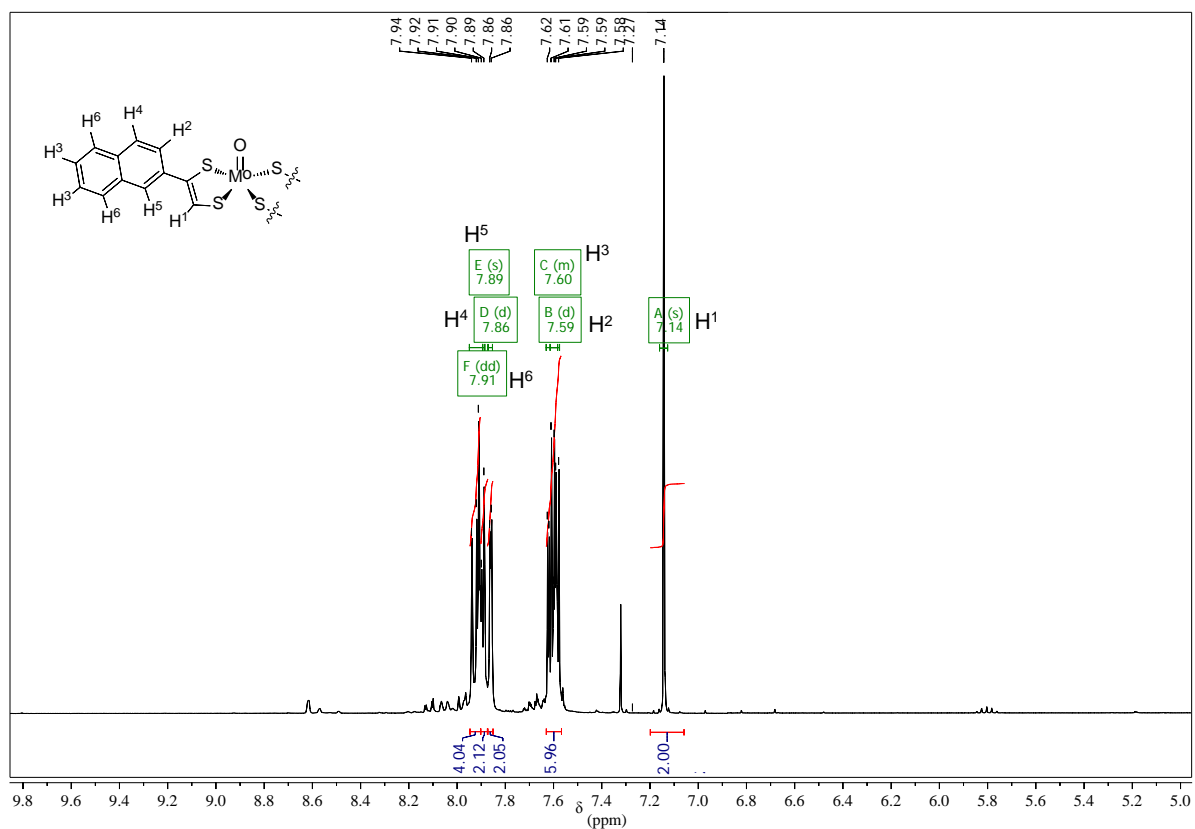

**Figure S4.** The 300 MHz  $^1\text{H}$  NMR spectrum of compound **1** in  $\text{CDCl}_3$  in the aromatic region.

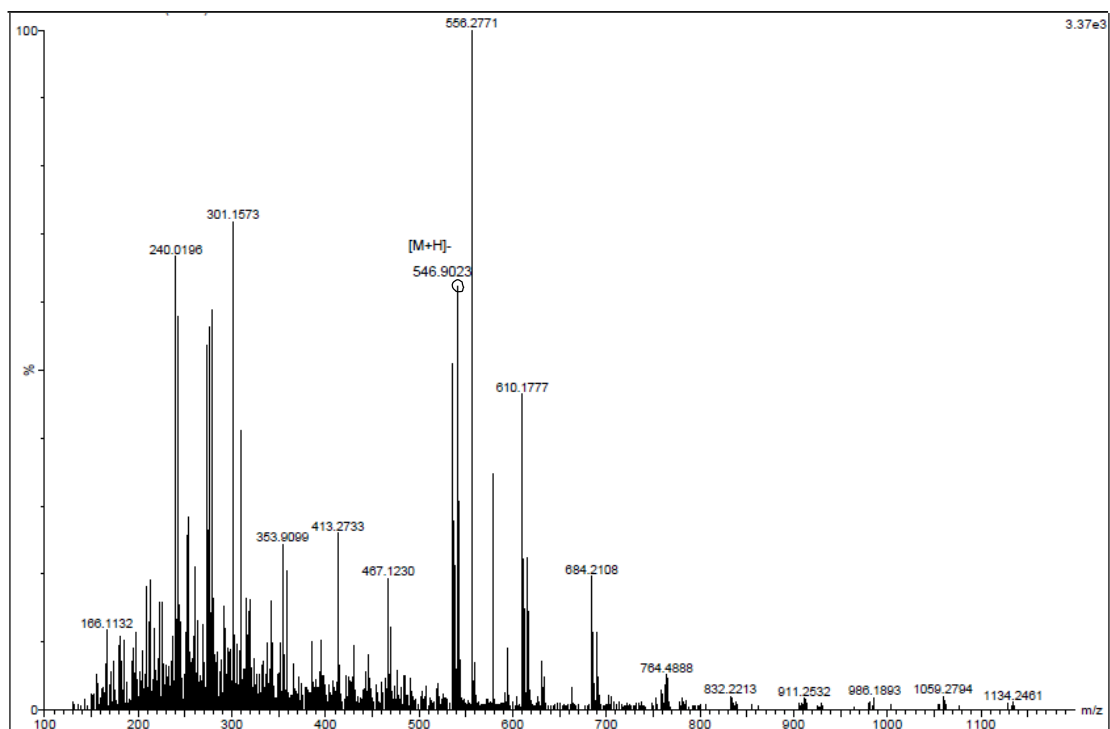

**Figure S5.** ESI MS spectrum from dissolution of  $(\text{Bu}_4\text{N})_2[\text{MoO}(\text{ntdt})_2]$  in acetonitrile showing its  $[\text{M}+\text{H}]^+$  cation adduct at  $m/z$  546.90.

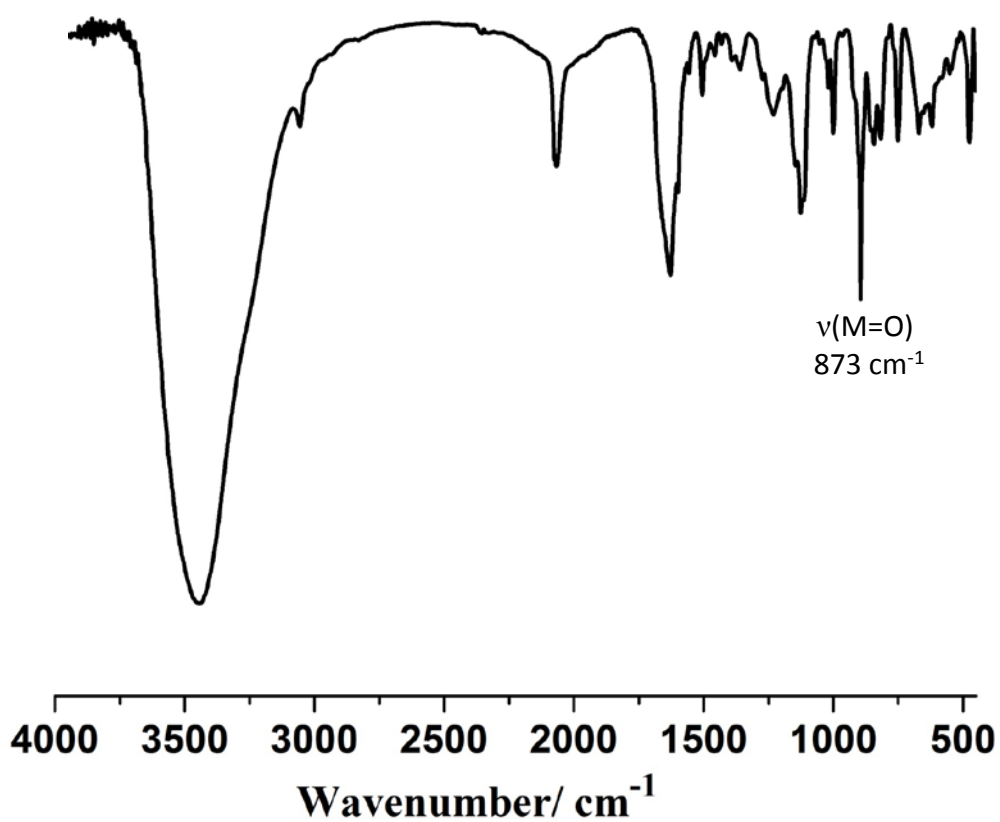

**Figure S6.** IR spectrum of  $(\text{Bu}_4\text{N})_2[\text{MoO}(\text{ntdt})_2]$  recorded in KBr Pellets showing the  $\nu(\text{Mo}=\text{O})$  at  $873\text{ cm}^{-1}$ .

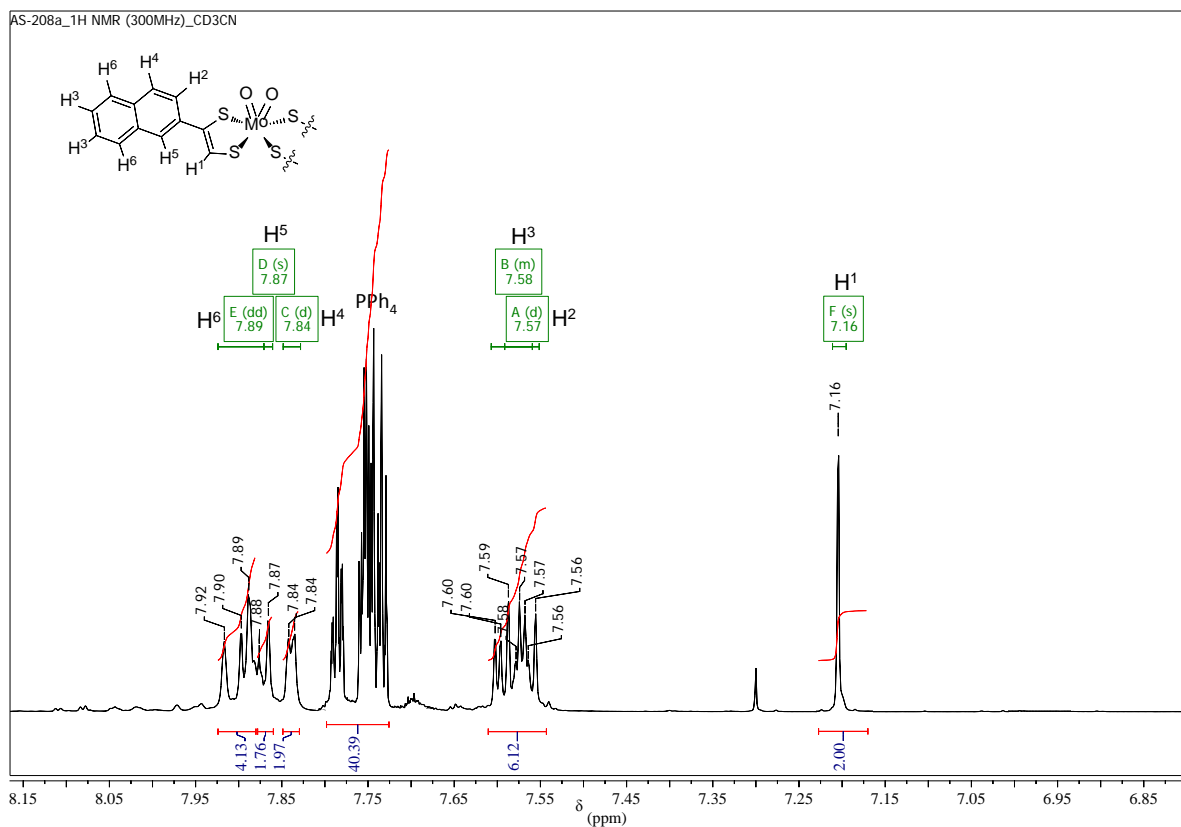

**Figure S7.** The 300 MHz  $^1\text{H}$  NMR spectrum of compound **2** in  $\text{CD}_3\text{CN}$  in the aromatic region.

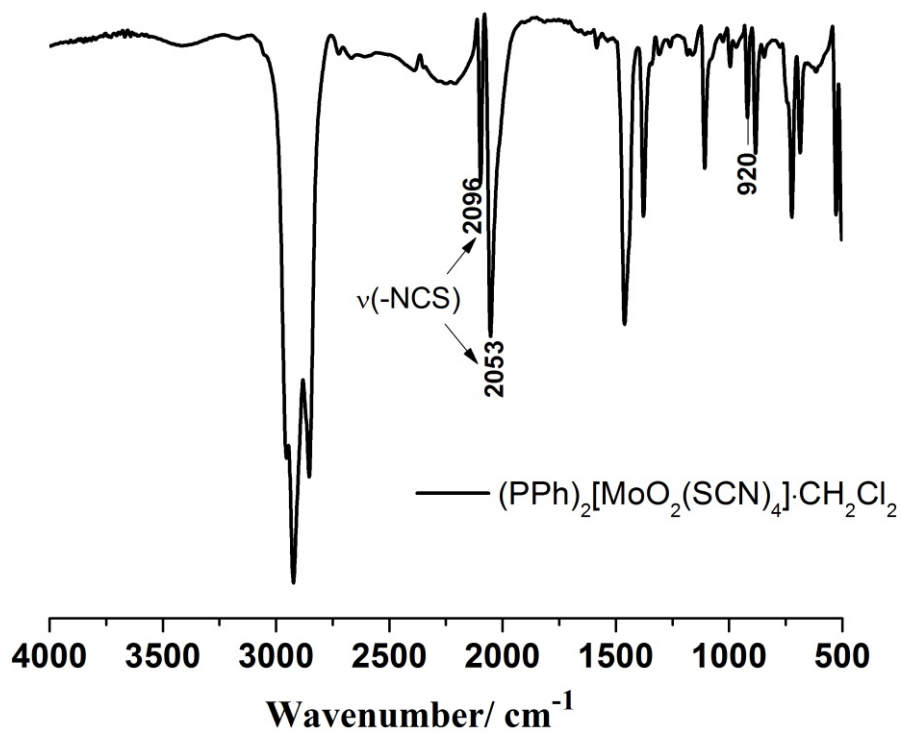

**Figure S8.** IR spectrum of  $(\text{PPh}_4)_2[\text{MoO}_2(\text{SCN})_4]$  recorded in KBr Pellets showing the  $\nu(-\text{NCS})$  bands (at 2096  $\text{cm}^{-1}$  and 2053  $\text{cm}^{-1}$ ) and  $\nu(\text{Mo}=\text{O})$  at 920  $\text{cm}^{-1}$ .

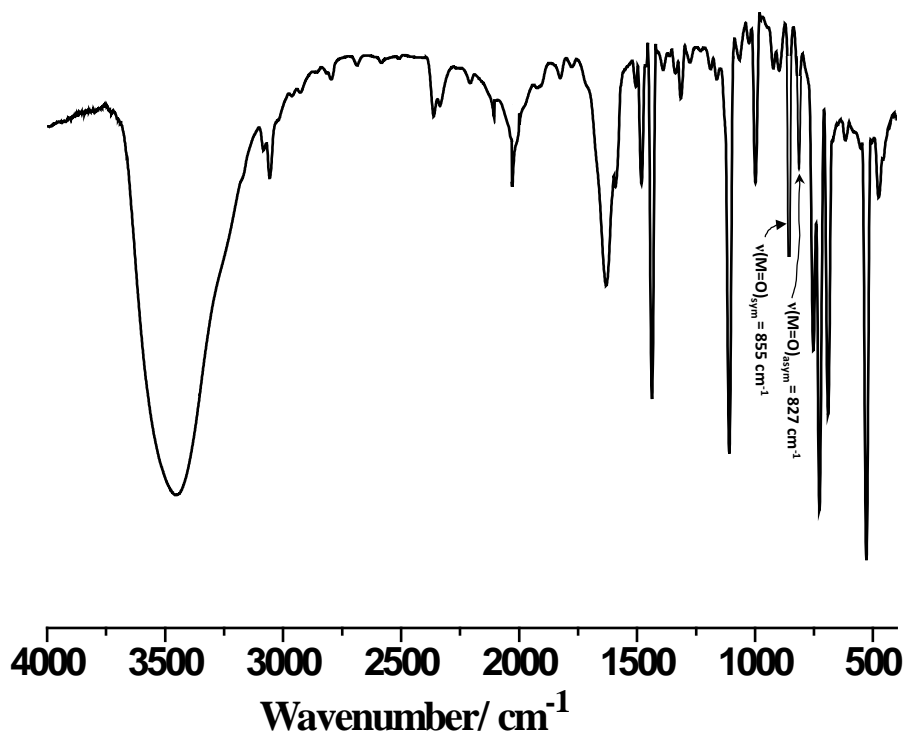

**Figure S9.** IR spectrum of compound **2** recorded in KBr Pellets showing the  $\nu(\text{Mo}=\text{O})_{\text{sym}}$  at  $855 \text{ cm}^{-1}$  and  $\nu(\text{Mo}=\text{O})_{\text{asym}}$  at  $827 \text{ cm}^{-1}$ .

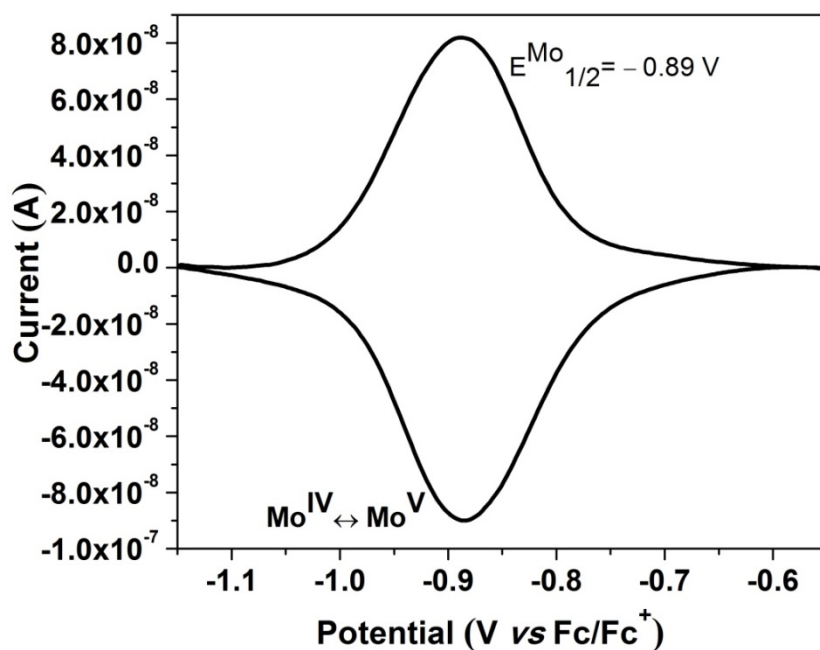

**Figure S10.** Differential pulse voltammogram (DPV) of compound **1** in  $\text{CH}_3\text{CN}$  containing  $0.1 \text{ M Bu}_4\text{NPF}_6$ . The peak potentials were recorded vs internal reference  $[\text{Fc}]/[\text{Fc}]^+$  at  $298 \text{ K}$ .

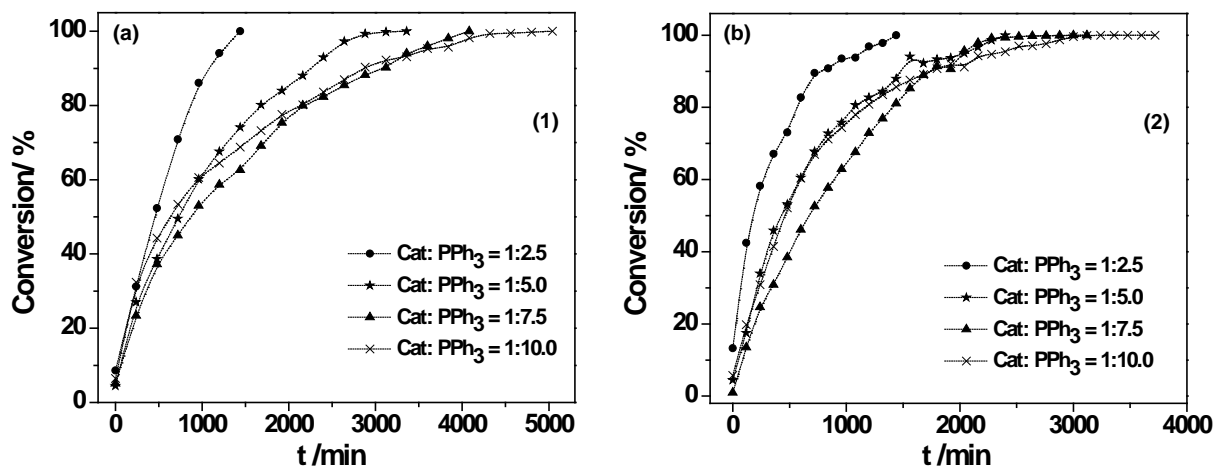

**Figure S11.** Conversion of  $\text{PPh}_3$  oxidized by DMSO with time with different catalyst: $\text{PPh}_3$  molar ratios (a) for complex 1, (b) for complex 2.

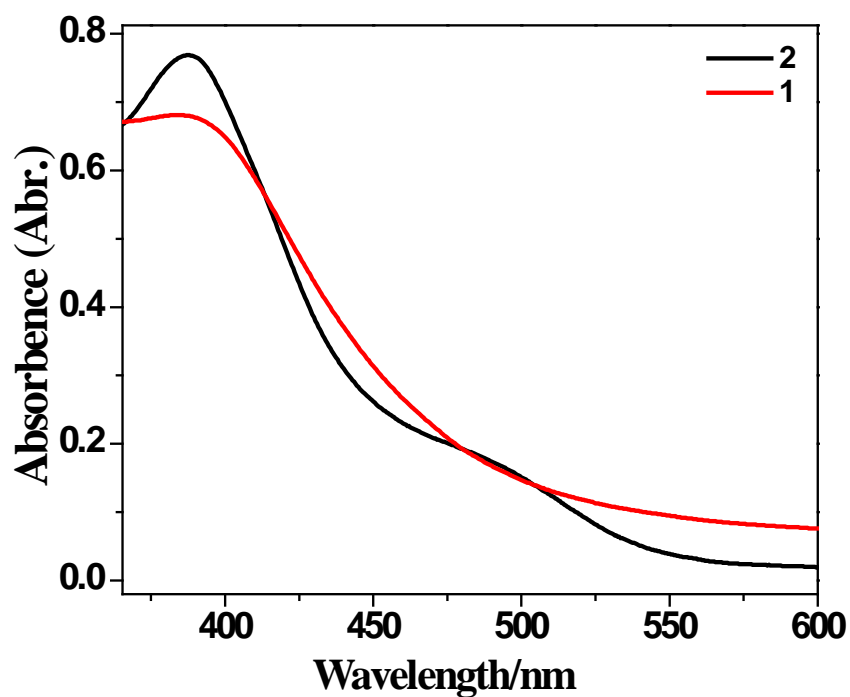

**Figure S12.** UV-Vis spectra of compounds 1 and 2 ( $c = 1 \times 10^{-4}$ ) in acetonitrile at 25 °C.



**Table S2.** Full list of bond distances [Å] and angles [°] for [Bu<sub>4</sub>N]<sub>2</sub>[MoO(ntdt)<sub>2</sub>]**(1)**.

---

| Distance, Å |            |         |           |
|-------------|------------|---------|-----------|
| Mo1-O1      | 1.7023(17) | Mo1-S4  | 2.3771(8) |
| Mo1-S3      | 2.3822(8)  | Mo1-S1  | 2.3823(8) |
| Mo1-S2      | 2.3877(8)  | S1-C1   | 1.787(3)  |
| S2-C2       | 1.748(3)   | S3-C13  | 1.745(3)  |
| S4-C14      | 1.782(3)   | N1-C29  | 1.516(3)  |
| N1-C33      | 1.521(3)   | N1-C25  | 1.521(3)  |
| N1-C37      | 1.522(3)   | N2-C45  | 1.514(3)  |
| N2-C41      | 1.515(4)   | N2-C49  | 1.523(4)  |
| N2-C53      | 1.526(3)   | C1-C2   | 1.319(4)  |
| C1-C3       | 1.479(4)   | C3-C4   | 1.388(5)  |
| C3-C12      | 1.425(4)   | C4-C5   | 1.416(4)  |
| C5-C10      | 1.421(5)   | C5-C6   | 1.431(6)  |
| C6-C7       | 1.371(5)   | C7-C8   | 1.385(7)  |
| C8-C9       | 1.394(8)   | C9-C10  | 1.418(5)  |
| C10-C11     | 1.431(6)   | C11-C12 | 1.354(5)  |
| C13-C14     | 1.335(4)   | C14-C15 | 1.490(4)  |
| C15-C16     | 1.365(4)   | C15-C24 | 1.429(4)  |
| C16-C17     | 1.431(4)   | C17-C18 | 1.404(4)  |
| C17-C22     | 1.408(4)   | C18-C19 | 1.372(4)  |
| C19-C20     | 1.403(5)   | C20-C21 | 1.359(5)  |
| C21-C22     | 1.440(4)   | C22-C23 | 1.401(4)  |
| C23-C24     | 1.368(4)   | C25-C26 | 1.529(4)  |
| C26-C27     | 1.532(4)   | C27-C28 | 1.494(5)  |
| C29-C30     | 1.517(4)   | C30-C31 | 1.533(4)  |
| C31-C32     | 1.518(4)   | C33-C34 | 1.526(4)  |
| C34-C35     | 1.518(4)   | C35-C36 | 1.518(4)  |
| C37-C38     | 1.510(4)   | C38-C39 | 1.515(4)  |
| C39-C40     | 1.523(4)   | C41-C42 | 1.520(4)  |
| C42-C43     | 1.512(4)   | C43-C44 | 1.513(4)  |
| C45-C46     | 1.504(4)   | C46-C47 | 1.528(4)  |
| C47-C48     | 1.514(4)   | C49-C50 | 1.520(4)  |
| C50-C51     | 1.527(4)   | C51-C52 | 1.519(6)  |
| C53-C54     | 1.506(4)   | C54-C55 | 1.494(5)  |
| C55-C56     | 1.518(5)   |         |           |

  

| Angles, deg |            |           |            |
|-------------|------------|-----------|------------|
| O1-Mo1-S4   | 108.31(6)  | O1-Mo1-S3 | 109.46(6)  |
| S4-Mo1-S3   | 82.93(2)   | O1-Mo1-S1 | 110.59(6)  |
| S4-Mo1-S1   | 84.98(3)   | S3-Mo1-S1 | 139.94(3)  |
| O1-Mo1-S2   | 108.43(7)  | S4-Mo1-S2 | 143.25(3)  |
| S3-Mo1-S2   | 85.02(3)   | S1-Mo1-S2 | 82.28(3)   |
| C1-S1-Mo1   | 108.29(10) | C2-S2-Mo1 | 106.68(11) |

|             |            |             |            |
|-------------|------------|-------------|------------|
| C13-S3-Mo1  | 106.42(10) | C14-S4-Mo1  | 107.38(9)  |
| C29-N1-C33  | 111.33(19) | C29-N1-C25  | 111.2(2)   |
| C33-N1-C25  | 106.39(19) | C29-N1-C37  | 105.70(18) |
| C33-N1-C37  | 111.61(19) | C25-N1-C37  | 110.66(19) |
| C45-N2-C41  | 111.3(2)   | C45-N2-C49  | 106.6(2)   |
| C41-N2-C49  | 110.5(2)   | C45-N2-C53  | 110.2(2)   |
| C41-N2-C53  | 107.05(19) | C49-N2-C53  | 111.3(2)   |
| C2-C1-C3    | 124.3(3)   | C2-C1-S1    | 117.9(2)   |
| C3-C1-S1    | 117.5(2)   | C1-C2-S2    | 124.1(2)   |
| C4-C3-C12   | 118.3(3)   | C4-C3-C1    | 120.8(3)   |
| C12-C3-C1   | 120.9(3)   | C3-C4-C5    | 122.2(3)   |
| C4-C5-C10   | 118.8(4)   | C4-C5-C6    | 121.9(3)   |
| C10-C5-C6   | 119.3(3)   | C7-C6-C5    | 119.7(4)   |
| C6-C7-C8    | 121.7(5)   | C7-C8-C9    | 120.2(4)   |
| C8-C9-C10   | 120.2(5)   | C9-C10-C5   | 118.9(4)   |
| C9-C10-C11  | 123.1(4)   | C5-C10-C11  | 118.0(3)   |
| C12-C11-C10 | 122.0(4)   | C11-C12-C3  | 120.7(4)   |
| C14-C13-S3  | 123.4(2)   | C13-C14-C15 | 123.7(2)   |
| C13-C14-S4  | 118.6(2)   | C15-C14-S4  | 117.5(2)   |
| C16-C15-C24 | 117.1(3)   | C16-C15-C14 | 122.1(2)   |
| C24-C15-C14 | 120.8(3)   | C15-C16-C17 | 123.0(3)   |
| C18-C17-C22 | 119.8(3)   | C18-C17-C16 | 122.3(3)   |
| C22-C17-C16 | 117.9(3)   | C19-C18-C17 | 120.0(3)   |
| C18-C19-C20 | 121.6(3)   | C21-C20-C19 | 119.4(3)   |
| C20-C21-C22 | 121.0(3)   | C23-C22-C17 | 119.5(3)   |
| C23-C22-C21 | 122.2(3)   | C17-C22-C21 | 118.3(3)   |
| C24-C23-C22 | 120.8(3)   | C23-C24-C15 | 121.6(3)   |
| N1-C25-C26  | 114.7(2)   | C25-C26-C27 | 111.5(2)   |
| C28-C27-C26 | 114.6(3)   | N1-C29-C30  | 115.7(2)   |
| C29-C30-C31 | 110.3(2)   | C32-C31-C30 | 113.7(2)   |
| N1-C33-C34  | 115.1(2)   | C35-C34-C33 | 109.8(2)   |
| C34-C35-C36 | 112.8(3)   | C38-C37-N1  | 116.8(2)   |
| C37-C38-C39 | 110.0(2)   | C38-C39-C40 | 112.9(2)   |
| N2-C41-C42  | 113.9(2)   | C43-C42-C41 | 111.4(2)   |
| C42-C43-C44 | 110.9(2)   | C46-C45-N2  | 116.6(2)   |
| C45-C46-C47 | 109.8(2)   | C48-C47-C46 | 112.7(3)   |
| C50-C49-N2  | 114.5(2)   | C49-C50-C51 | 112.1(3)   |
| C52-C51-C50 | 113.9(3)   | C54-C53-N2  | 115.6(2)   |
| C55-C54-C53 | 112.6(3)   | C54-C55-C56 | 112.6(3)   |

---
